# Supplementary material for: Animal Models and Pathogenesis of Thoracic Aortic Aneurysm
Source: Preprints.org preprint supplement (doi:10.20944/preprints202312.1411.v1), 2023-12-19
Supplement: Supplementary file 1 [file supplementary]

Supplementary tables

Animal models and pathogenesis of thoracic aortic aneurysm

Yutang Wang 1, *, Indu S. Panicker 1, Jack Anesi 1, Owen Sargisson 1, Benjamin Atchison 1, Andreas J.R. Habenicht 2

1. Discipline of Life Science, Institute of Innovation, Science and Sustainability, Federation University Australia, Ballarat, VIC, Australia.
2. Institute for Cardiovascular Prevention, Ludwig-Maximilians-Universität München (LMU), Munich, Germany

***** Correspondence: [yutang.wang@federation.edu.au](mailto:yutang.wang@federation.edu.au)

**Table S1**. Recent studies employing BAPN-induced TAA models in rodents

| Species, strain | Sex | Age  (w) | BAPN  dose | Induction  time, w | Aortic diameter Increase | TAA  Rate, % | Rupt.  rate,% | Dissection | Ref |
| --- | --- | --- | --- | --- | --- | --- | --- | --- | --- |
| Mice, C57BL/6 | M | 3 | 1 g/kg/d in DW | 4 w | Yes | NR | NR | Yes | [1] |
| Mice, C57BL/6 | M | 3 | 1 g/kg/d in DW | 4 w | Yes | NR | NR | Yes | [2] |
| Mice, C57BL/6 | M | 3 | 1 g/kg/d in DW | 4 w | Yes | NR | 45.7 | Yes | [3] |
| Mice, C57BL/6 | M | 3 | 1 g/kg/d in DW | 4 w | Yes | 73.3 | 46.7 | Yes | [4] |
| Mice, C57BL/6 | M | 3 | 1 g/kg/d in DW | 4 w | Yes | NR | <80 | Yes | [5] |
| Mice, C57BL/6 | M | 3 | 1 g/kg/d in DW | 4 w | NR | NR | 80 | Yes | [6] |
| Mice, C57BL/6 | M | 3 | 1 g/kg/d in DW | 4 w | Yes | NR | 23.3 | Yes | [7] |
| Mice, C57BL/6 | NR | 3 | 1 g/kg/d in DW | 4 w | Yes | NR | 14.3 | Yes | [8] |
| Mice, C57BL/6 | NR | 3 | 1 g/kg/d in DW | 4 w | Yes | NR | >50 | Yes | [9] |
| Mice, C57BL/10 | M | 3 | 0.5 g/kg/d in DW | 4 w | NR | NR | <60 | Yes | [10] |
| Mice, C57BL/6 | M | 3 | 0.5 g/kg/d in DW | 4 w | Yes | NR | 11 | Yes | [11] |
| Mice, C57BL/6 | M | 3 | 0.5 g/kg/d in DW | 4 w | NR | NR | 12.5 | Yes | [12] |
| Mice, C57BL/6 | M & F | 3 | 0.5 g/kg/d in DW | 1, 2, 3 or 4 w | Yes | NR | 86.7 (M)  58.8 (F) | Yes | [13] |
| Mice, C57BL/6 | M | 3 | 0.4 g/100 g diet | 18 d | Yes | NR | NR | Yes | [14] |
| Mice, C57BL/6 | M | 3 | 6 g/L in DW | 4 w | Yes) | 83.3 | NR | Yes | [15] |
| Mice, C57BL/6 | NR | 3 | 2.5g/L in DW | 4 w | Yes | 42.9 | 42.9 | Yes | [16] |
| Mice, C57BL/6 SJL | M | 3-4 | 3 g/L in DW | 26 w | Yes | 50 | 15.2 | NR | [17] |
| Mice, C57BL/6 | M | 3 | 1 g/L in DW | 6 w | Yes | NR | 66 | NR | [18] |
| Rats, SD | M | 3 | 1 g/kg/d, intragastric | 4 w | Yes | 16.7 | 0 | NR | [19] |

BAPN, β-aminopropionitrile; d, day; DR, drink water; F, female; M, male; NR, not reported; Rupt., rupture; SD, Sprague-Dawley; w, weeks.

**Tablel S2.** Recent studies employing rodent TAA models induced by angiotensin II infusion

| Species | Strain | Sex | Age,  W | Dose,  μg/kg per min | Time, W | TAA rate, % | Rupture rate, % | Dissection  rate, % | Ref |
| --- | --- | --- | --- | --- | --- | --- | --- | --- | --- |
| Mice | ApoE−/− | M | 12 | 1 | 4 | NR | NR | NR | [20] |
| Mice | ApoE−/− | M | 8-10 | 1 | 4 | NR | NR | NR | [21] |
| Mice | ApoE−/− | M | adult | NR | NR | NR | NR | NR | [22] |
| Mice | Wild type  and  Plce1−/− | M&F | 10 to 12 | 1 | 4 | 80% | 43% | NR | [23] |
| Mice | Wild type  and  Loxl4−/− | M | 14 or 20 | 1 or 1.5 | 4 | 28.6% | NR | NR | [24] |
| Mice | Wild type and  Tfam−/− | M | 4-5 | 1 | 4 | 100% | 70% | 70% | [25] |
| Rat | SD | F | 8 | 1.2 | 4 | 85% | NR | NR | [26] |

ApoE−/−, apolipoprotein E-deficient; F, female; Loxl4−/−, lysyl oxidase (LOX)-like proteins 4-deficient; M, male;NR, not reported; Plce1−/−, phospholipase Cε-insufficient; SD, Sprague-Dawley; Tfam−/−, mitochondrial transcription factor A-deficient;W, week.

**Table S3**: Recent studies employing elastase-induced TAA models in rodents

| Species,  strain | Sex | Age, w | PPE site | PPE dose | PPE time,  min | Experimental period, w | TAA rate, % | Rupture rate, % | Dissection rate, % | Ref |
| --- | --- | --- | --- | --- | --- | --- | --- | --- | --- | --- |
| Mice,  C57BL/6 | M | 8-12 | ATA & arch | 15 µL | 5 or  10 | 1-4 | 43 or  71 | 0 or 18 | NR | [27] |
| Mice,  C57BL/6 | M | 8-12 | DTA | NR | 4 | 2 | NR | NR | NR | [28] |
| Mice,  C57BL/6 | M | 8-10 | DTA | 12 μL | 3 | 2 | 100 | NR | NR | [29] |
| Rats, SD | F | 12 | DTA | NR | 15-20 | NR | NR | NR | NR | [30] |

ATA, ascending thoracic aorta; DTA, descending thoracic aorta; NR, not reported; PPE, porcine pancreatic elastase; SD, Sprague-Dawley; TAA, thoracic aortic aneurysm; w, week.

**Table S4**. Recent studies employing CaCl2-induced TAA models in rodents

| Species, strain | Sex | Age | CaCl2  Conc. | CaCl2  time, min | Exp. Duration,  Weeks | Aortic diameter increase | TAA  Rate, % | Rupt.  rate,% | Dissection rate, %  (or yes/no) | Ref |
| --- | --- | --- | --- | --- | --- | --- | --- | --- | --- | --- |
| Mice,  129/SvE | M&F | NR | 0.5 M | 15 | 4 | 25% | NR | NR | NR | [31] |
| Mice,  C57BL/6 | M&F | 10 w | 0.5 M | 15 | 4, 8, 16 | 59.5% 4 w  64.3% 8 w  62.9% 16 w | 90% | NR | NR | [32] |
| Rats, WS | M | NR | 0.5 M | 15 | 4 | 18% | NR | NR | NR | [33] |
| Rats, SD | NR | NR | 0.5 M | 15 | 4 | NR | NR | NR | NR | [34] |

CalCl2, calcium chloride; Conc., concentration; Exp., experimental; F, female; M, male; NR, not reported; Ref, reference; Rupt., rupture; SD, Sprague-Dawley; TAA, thoracic aortic aneurysm; w, week; WS, Wistar.

**Table S5.** Recent studies employing combination of BAPN and angiotensin II-induced TAA models in rodents

| Species | Strain | Sex | Age,  W | BAPN | | | Angiotensin II | | TAA rate, % | TAA diameter increase | Rupture | Dissection | Reference |
| --- | --- | --- | --- | --- | --- | --- | --- | --- | --- | --- | --- | --- | --- |
|  |  |  |  | Dose | Time, days | Route | Dose,  μg/kg/min | Time, day |  |  |  |  |  |
| Mice | C57BL/6 | M | 3 | 0.15 μg/kg/d | 28 | i.p. | 1 | 3 | 40 | Yes | Yes | NR | [35] |
|  |  |  |  |  |  |  |  | 28 | 73 |  |  |  |  |
| Mice | C57BL/6 | M & F | 10–15 | 0.2% | 28 | DW | 1 | 25 (3 days after initiation of BAPN) | NR | Yes | Yes | NR | [36] |
| Mice | C57BL/6, or FVB | M | 3 | 0.4% | 28 | Diet | 1 | 1 | NR | NR | Yes | Yes,100% | [37] |
| Mice | C57BL/6 | M | 3 | 1 μg/kg/d | 28 | DR | 1 | 2 | 25 | Yes | Yes | Yes | [38] |

BAPN, β-aminopropionitrile; DR, drinking water; i.p., intraperitoneal;NR, not reported; TAA, thoracic aortic aneurysm; W, week;

**Table S6: Recent studies investigating potent therapeutic target against TAA in animal models**

| TAA induction | Animals | Intervention | TAA incidence | Aortic diameter | Rupture | Mechanism | Targets | Ref |
| --- | --- | --- | --- | --- | --- | --- | --- | --- |
| Inflammation | | | | | | | | |
| BAPN | C57BL/6 mice | Dexamethasone | ↓ | ↓ | NR | ↓ Macrophage and neutrophil infiltration  ↓ Apoptosis of VSMC  ↓ MMP 2/9  ↓ ECM degradation | Inflammation  Apoptosis  ECM degradation | [3] |
| Genetic | VSMC-specific Tgfbr2- deficient mice | Dexamethasone | ↓ | ↓ | NR | ↓ CCL8  ↓ Macrophage infiltration  ↓ MMP2  ↓ NF-*κ*B | Inflammation | [39] |
| Genetic | Fbn1C1039G/+ mice | Folic acid | ↓ | ↓ | NR | ↓ NOX4  ↓ Superoxide production  ↓ Elastin fiber fragmentation | Inflammation  ECM degradation | [40] |
| BAPN | C57BL/6 | Metformin | ↔ | ↓ | ↔ | ↓ Inflammation  ↓ Elastin breakage | Inflammation  ECM degradation | [15] |
| BAPN | C57BL/6 mice | Melatonin | ↓ | ↓ | ↓ | ↑ SIRT1 signalling  ↓ Macrophage infiltration  ↓ MMP2, MMP9  ↓ Reactive oxygen species  ↓ VSMC loss | Inflammation  Oxidative stress | [7] |
| Genetic | Fbn1mgR/mgR | Digoxin | NR | ↓ | NR | ↑ miR-122,  ↓ CCL2  ↓ MMP12  ↓ Elastin fragmentation | Inflammation  ECM degradation | [41] |
| BAPN | C57BL/6 | Oltipraz (Nrf activator) | ↓ | ↓ | ↓ | ↓ Apoptosis  ↓ Macrophage infiltration  ↓ MMP | Inflammation  Apoptosis | [9] |
| BAPN | C57BL/6 mice | TEPP-46 (activator of glycolytic enzyme pyruvate kinase M2) | ↓ | ↓ | ↓ | ↓ Inflammatory cells infiltration  ↓ ROS  ↓ Caspase 1  ↓ VSMCs loss | Inflammation  Oxidative stress  Apoptosis | [8] |
| CaCl2 | Sprague-Dawley rats | Cordycepin, (an anti-inflammatory and antioxidant compound) | ↓ | ↓ | NR | ↓ VEGF  ↓ IL-6, TNF-α and IL-1β  ↓ ROS  ↓ Caspase 3/9 and apoptosis | Inflammation  Oxidative stress  Apoptosis | [34] |
| BAPN | C57Bl/6 mice | Myriocin | ↓ | NR | ↓ | ↓ Inflammation (IL-1β, TNF-  α, and IL-6) | Inflammation | [12] |
| BAPN+  AngII | C57Bl/6 mice | Senkyunolide I | ↓ | ↓ | ↓ | ↓ Inflammation  ↓ ROS  ↓ Apoptosis  ↑ Elastin integrity | Inflammation  Oxidative stress  Apoptosis  ECM degradation | [42] |
| Ang II,  BAPN,  Genetic | Mice | Allopurinol | ↓ | ↓ | ↓ | ↓ Uric acid  ↓ Inflammation | Inflammation | [43] |
| Ang II | ApoE−/− mice | Angiotensin 1-7 | ↓ | ↓ | NR | ↓ Inflammation  ↓ MMP2, 9  ↑ Elastin integrity | Inflammation | [21] |
| BAPN | C57BL/10 mice | Macrophage inhibitors Ki20227, mLR12 | ↓ | ↓ | ↓ | ↓ Macrophage infiltration  ↓ Inflammation  ↓ MMP 2&9 | Inflammation | [10] |
| BAPN  TAC  Genetic | C57B/L6 mice  Fbn1C1041G/+ mice | Angiogenic factor with G-patch and FHA domains 1 | ↓ | ↓ | NR | ↓TGF-β and ERK1/2  ↓ Inflammation | TGFβ  Inflammation | [16] |
| BAPN | C57/BL6 SJL | Moderate aerobic exercise | ↓ | ↓ | ↓ | ↓ TGF-β pathway  ↓ Inflammatory markers  ↑ Elastogenesis | Inflammation  ECM formation | [17] |
| Genetic | Fbn1C1039G/+ mice | Antisense oligonucleotide against angiotensinogen | ↓ | ↓ | NA | ↓ Inflammatory gene expression  ↓ Elastin fragmentation | Inflammation  ECM degradation | [44] |
| Elastase | C57Bl/6 mice | Administration of mesenchymal stem cells | ↓ | ↓ | NR | ↓ T cell, neutrophil and macrophage infiltration  ↓ Proinflammatory cytokines  ↑ Anti-inflammatory IL-10  ↓ Elastic degradation | Inflammation  ECM degradation | [28] |
| Apoptosis | | | | | | | | |
| BAPN | SD rats | Methamphetamine | ↑ | ↑ | ↑ | ↑ MMP 2&9  ↑ Elastin breakage  ↑ VSMC apoptosis | Apoptosis  ECM degradation | [19] |
| BAPN | C57BL/6 Mice | Ciprofloxacin (antibiotic) | ↑ | ↑ | ↑ | ↑ Apoptosis  ↑ MMP9  ↑ ECM degradation | Apoptosis  ECM degradation | [2] |
| BAPN | C57BL6 mice | Diesel exhaust particulate | ↑ | ↑ | ↔ | ↑ apoptosis  ↑ BAX/Bcl2  ↑ Caspase 3/cleaved Cas3 | Apoptosis | [45] |
| BAPN | C57BL/6 mice | Dexamethasone | ↓ | ↓ | NR | ↓ Macrophage and neutrophil infiltration  ↓ Apoptosis of VSMC  ↓ MMP 2/9  ↓ ECM degradation | Inflammation  Apoptosis  ECM degradation | [3] |
| BAPN | C57BL/6 mice | TEPP-46 (activator of glycolytic enzyme pyruvate kinase M2) | ↓ | ↓ | ↓ | ↓ Inflammatory cells infiltration  ↓ ROS  ↓ Caspase 1  ↓ VSMCs loss | Inflammation  Oxidative stress  Apoptosis | [8] |
| CaCl2 | SD rats | Cordycepin, (an anti-inflammatory and antioxidant compound) | ↓ | ↓ | NR | ↓ VEGF  ↓ IL-6, TNF-α and IL-1β  ↓ ROS  ↓ Caspase 3/9 and apoptosis | Inflammation  Oxidative stress  Apoptosis | [34] |
| Genetic | Fbn1C1041G/+ mice | Nitro-oleic acid | ↓ | ↓ | NR | ↓ ERK1/2  ↓ Smad2  ↑ NF-κB  ↓ MMP2  ↓ Apoptosis | TGFβ  Inflammation  Apoptosis | [46] |
| BAPN | C57BL/6 | Oltipraz (Nrf activator) | ↓ | ↓ | ↓ | ↓ Apoptosis  ↓ Macrophage infiltration  ↓ MMP | Inflammation  Apoptosis | [9] |
| ECM degradation | | | | | | | | |
| Genetic | Fbn1C1039G/+ mice | Rapamycin | ↓ | ↓ | NR | ↓miR-126-3p and subsequent ERK1/2 signalling  ↓MMP-9 expression  ↓Elastin degradation | ECM degradation | [47] |
| BAPN | C57BL/6 mice | Rapamycin | ↓ | ↓ | ↔ | ↓ mTOR pathway  ↓ Macrophage and neutrophil infiltration  ↓ MMP9  ↓ Elastic fiber fragmentation | mTOR  ECM degradation | [4] |
| Genetic | Mice deficient in hamartin, an inhibitor of mTOR | Rapamycin | ↓ | NR | NR | ↓ mTOR activation  ↓ Elastic fiber fragmentation | mTOR  ECM degradation | [48] |
| Genetic | Fbln4SMKO C57BL/6 mice | Dabigatran (thrombin inhibitor)  Rivaroxaban (factor Xa inhibitor) | ↓ | NR | NR | ↓ Protease activated receptor 1 | ECM | [49] |
| Genetic | Fbn1C1039G/+ mice | ODQ (sGC inhibitor)  KT5823 (PRKG inhibitor)  PRKG1 silencing | NR | ↓ | NR | ↓Elastin fiber fragmentation | NO–sGC–PRKG  ECM degradation | [50] |
| Genetic | Fbn1mgR/mgR mice | DAPT (Notch inhibitor) | NR | ↓ | ↓ | ↓ Elastin degradation | ECM degradation | [51] |
| Genetic | Fbn1C1039G/+ mice | HIPK2 Inhibitor BT173 | ↓ | ↓ | ↓ | ↓ Elastin fiber fragmentation  ↓Collagen accumulation | ECM degradation | [52] |
| Genetic | Fbn1C1039G/+ mice | Flutamide (androgen receptor blocker) | NR | ↓ | NR | ↓ Erk1/2, Smad2  ↓ MMP2  ↓ Elastin fiber fragmentation | TGFβ  ECM degradation | [53] |
| BAPN | C57BL/6 mice | Crocin (MMP inhibitor) | ↓ | ↓ | ↓ | ↓ MMP activity  ↓ Elastin degradation | ECM degradation | [5] |
| Genetic | Fbn1C1039G/+ mice | Nicotinamide riboside (NAD+ precursor to normalize mitochondrial function) | NR | ↓ | NR | ↑ Mitochondrial dysfunction  ↓ Elastin fiber fragmentation | Mitochondrial function  ECM degradation | [25] |
| Ang II | SD rats | AgomiR-22 | NR | ↓ | NR | ↓ MMP-9  ↑ ECM integrity | ECM degradation | [26] |
| CaCl2 | C57BL/6 mice | miR-133a overexpression | ↓ | ↓ | NR | ↓ Pro – protein convertase furin  ↓ Elastic fiber fragmentation | ECM degradation | [32] |
| Miscellaneous | | | | | | | | |
| Genetic | Fbn1C1039G/+ mice | Vitamin B | ↓ | ↓ | NR | ↑Smad4  ↑ collagen maturation | Collagen maturation | [54] |
| Genetic | Fbn1mgR/mgR mice | baclofen (GABAB receptor agonist) | ↓ | ↓ | ↓ | ↑ muscle contractility  ↑ aortic wall microarchitecture | Contractility | [55] |
| TGFβ inhibition | Zebrafish | TGFβ antagonist LY364947 | ↑ | ↑ | NR | ↓ pSmad3 | TGFβ | [56] |

↔, no effect; ↑, increase; ↓, decrease; Ang II, angiotensin II; ApoE−/−, apolipoprotein E-deficient; BAPN, β-aminopropionitrile; Bcl2, B-cell lymphoma 2; CaCl2, calcium chloride; CCL, chemokine (C-C motif) ligand; ECM, extracellular matrix; Erk, extracellular signal–regulated kinase; Fbn1, fibrillin-1; Fbln4, fibulin-4; Fbln4SMKO, smooth muscle-specific fibulin-4 knockout; GABA, gamma-aminobutyric acid; HIPK2, homeodomain-interacting protein kinase 2; IL, interleukin; MMP, matrix metalloproteinases; mTOR, mammalian target of rapamycin; NF-κB, Nuclear Factor Kappa B;NO, nitirc oxide; NR, not reported; Nrf: nuclear factor erythroid 2-related factor 2; Ltbp, latent TGFβ-binding protein; NOX4, NADPH oxidase 4;PRKG1, type 1 cGMP-dependent protein kinase; Ref, reference; ROS, reactive oxygen species; SD, Sprague-Dawley; sGC, soluble guanylate cyclase; SIRT1, sirtuin 1; Smad, suppressor of mothers against decapentaplegic; TGFβ, transforming growth factor-beta; Tgfbr2, TGFβ type 2receptor; TNF-α, tumor necrosis factor alpha; VEGF, vascular endothelial growth factor; VSMCs, vascular smooth muscle cells.

1. Yang, Y. Y.; Jiao, X. L.; Yu, H. H.; Li, L. Y.; Li, J.; Zhang, X. P.; Qin, Y. W., Angiopoietin-like protein 8 deficiency attenuates thoracic aortic aneurysm/dissection development in β-aminopropionitrile monofumarate-induced model mice. *Biochim Biophys Acta Mol Basis Dis* **2023,** 1869, (2), 166619.

2. Xiang, B.; Abudupataer, M.; Liu, G.; Zhou, X.; Liu, D.; Zhu, S.; Ming, Y.; Yin, X.; Yan, S.; Sun, Y.; Lai, H.; Wang, C.; Li, J.; Zhu, K., Ciprofloxacin exacerbates dysfunction of smooth muscle cells in a microphysiological model of thoracic aortic aneurysm. *JCI Insight* **2023,** 8, (2), e161729.

3. Wang, X.; Zhang, X.; Qiu, T.; Yang, Y.; Li, Q.; Zhang, X., Dexamethasone reduces the formation of thoracic aortic aneurysm and dissection in a murine model. *Exp Cell Res* **2021,** 405, (2), 112703.

4. Zhou, B.; Li, W.; Zhao, G.; Yu, B.; Ma, B.; Liu, Z.; Xie, N.; Fu, Y.; Gong, Z.; Dai, R.; Zhang, X.; Kong, W., Rapamycin prevents thoracic aortic aneurysm and dissection in mice. *J Vasc Surg* **2019,** 69, (3), 921-932.e3.

5. Qi, F.; Liu, Y.; Zhang, K.; Zhang, Y.; Xu, K.; Zhou, M.; Zhao, H.; Zhu, S.; Chen, J.; Li, P.; Du, J., Artificial Intelligence Uncovers Natural MMP Inhibitor Crocin as a Potential Treatment of Thoracic Aortic Aneurysm and Dissection. *Front Cardiovasc Med* **2022,** 9, 871486.

6. Wang, F.; Tu, Y.; Gao, Y.; Chen, H.; Liu, J.; Zheng, J., Smooth Muscle Sirtuin 1 Blocks Thoracic Aortic Aneurysm/Dissection Development in Mice. *Cardiovasc Drugs Ther* **2020,** 34, (5), 641-650.

7. Xia, L.; Sun, C.; Zhu, H.; Zhai, M.; Zhang, L.; Jiang, L.; Hou, P.; Li, J.; Li, K.; Liu, Z.; Li, B.; Wang, X.; Yi, W.; Liang, H.; Jin, Z.; Yang, J.; Yi, D.; Liu, J.; Yu, S.; Duan, W., Melatonin protects against thoracic aortic aneurysm and dissection through SIRT1-dependent regulation of oxidative stress and vascular smooth muscle cell loss. *J Pineal Res* **2020,** 69, (1), e12661.

8. Le, S.; Zhang, H.; Huang, X.; Chen, S.; Wu, J.; Chen, S.; Ding, X.; Chen, S.; Zhao, J.; Xu, H.; Cui, J.; Zou, Y.; Yu, J.; Jiang, L.; Wu, J.; Ye, P.; Xia, J., PKM2 Activator TEPP-46 Attenuates Thoracic Aortic Aneurysm and Dissection by Inhibiting NLRP3 Inflammasome-Mediated IL-1β Secretion. *J Cardiovasc Pharmacol Ther* **2020,** 25, (4), 364-376.

9. Wang, D.; Wu, J.; Le, S.; Wang, H.; Luo, J.; Li, R.; Chen, X.; Song, Y.; Wu, L.; Ye, P.; Du, X.; Huang, X., Oltipraz, the activator of nuclear factor erythroid 2-related factor 2 (Nrf2), protects against the formation of BAPN-induced aneurysms and dissection of the thoracic aorta in mice by inhibiting activation of the ROS-mediated NLRP3 inflammasome. *Eur J Pharmacol* **2022,** 936, 175361.

10. Liu, X.; Chen, W.; Zhu, G.; Yang, H.; Li, W.; Luo, M.; Shu, C.; Zhou, Z., Single-cell RNA sequencing identifies an Il1rn(+)/Trem1(+) macrophage subpopulation as a cellular target for mitigating the progression of thoracic aortic aneurysm and dissection. *Cell Discov* **2022,** 8, (1), 11.

11. Zhang, S.; Liu, Z.; Xie, N.; Huang, C.; Li, Z.; Yu, F.; Fu, Y.; Cui, Q.; Kong, W., Pan-HDAC (Histone Deacetylase) Inhibitors Increase Susceptibility of Thoracic Aortic Aneurysm and Dissection in Mice. *Arterioscler Thromb Vasc Biol* **2021,** 41, (11), 2848-2850.

12. Yang, H.; Yang, F.; Luo, M.; Chen, Q.; Liu, X.; Zhang, Y.; Zhu, G.; Chen, W.; Li, T.; Shu, C.; Zhou, Z., Metabolomic Profile Reveals That Ceramide Metabolic Disturbance Plays an Important Role in Thoracic Aortic Dissection. *Front Cardiovasc Med* **2022,** 9, 826861.

13. Gong, Z.; Huang, J.; Wang, D.; Yang, S.; Ma, Z.; Fu, Y.; Ma, Q.; Kong, W., ADAMTS-7 deficiency attenuates thoracic aortic aneurysm and dissection in mice. *J Mol Med (Berl)* **2023,** 101, (3), 237-248.

14. Yang, X.; Xu, C.; Yao, F.; Ding, Q.; Liu, H.; Luo, C.; Wang, D.; Huang, J.; Li, Z.; Shen, Y.; Yang, W.; Li, Z.; Yu, F.; Fu, Y.; Wang, L.; Ma, Q.; Zhu, J.; Xu, F.; Cong, X.; Kong, W., Targeting endothelial tight junctions to predict and protect thoracic aortic aneurysm and dissection. *Eur Heart J* **2023,** 44, (14), 1248-1261.

15. Ma, W.; Zhang, J.; Liu, S.; Yan, S.; Xu, K.; Zhang, Y. S.; Abudupataer, M.; Ming, Y.; Zhu, S.; Xiang, B.; Zhou, X.; Luo, S.; Huang, H.; Tang, Y.; Zhang, S.; Xie, Z.; Chen, N.; Sun, X.; Li, J.; Lai, H.; Wang, C.; Zhu, K.; Zhang, W., Patient-derived microphysiological model identifies the therapeutic potential of metformin for thoracic aortic aneurysm. *EBioMedicine* **2022,** 81, 104080.

16. Da, X.; Li, Z.; Huang, X.; He, Z.; Yu, Y.; Tian, T.; Xu, C.; Yao, Y.; Wang, Q. K., AGGF1 therapy inhibits thoracic aortic aneurysms by enhancing integrin α7-mediated inhibition of TGF-β1 maturation and ERK1/2 signaling. *Nat Commun* **2023,** 14, (1), 2265.

17. Aicher, B. O.; Zhang, J.; Muratoglu, S. C.; Galisteo, R.; Arai, A. L.; Gray, V. L.; Lal, B. K.; Strickland, D. K.; Ucuzian, A. A., Moderate aerobic exercise prevents matrix degradation and death in a mouse model of aortic dissection and aneurysm. *Am J Physiol Heart Circ Physiol* **2021,** 320, (5), H1786-h1801.

18. Lu, X.; Zhu, M.; Zhao, L.; Qi, F.; Zou, H.; He, P.; Zhou, H.; Shi, K.; Du, J., (68)Ga-labeled WVP peptide as a novel PET probe for molecular biological diagnosis of unstable thoracic aortic aneurysm and early dissection: an animal study. *Front Cardiovasc Med* **2023,** 10, 1048927.

19. Luo, B. Y.; Zhou, J.; Guo, D.; Yang, Q.; Tian, Q.; Cai, D. P.; Zhou, R. M.; Xu, Z. Z.; Wang, H. J.; Chen, S. Y.; Xie, W. B., Methamphetamine induces thoracic aortic aneurysm/dissection through C/EBPβ. *Biochim Biophys Acta Mol Basis Dis* **2022,** 1868, (9), 166447.

20. Wu, H.; Xie, C.; Wang, R.; Cheng, J.; Xu, Q.; Zhao, H., Comparative analysis of thoracic and abdominal aortic aneurysms across the segment and species at the single-cell level. *Front Pharmacol* **2022,** 13, 1095757.

21. Jadli, A. S.; Ballasy, N. N.; Gomes, K. P.; Mackay, C. D. A.; Meechem, M.; Wijesuriya, T. M.; Belke, D.; Thompson, J.; Fedak, P. W. M.; Patel, V. B., Attenuation of Smooth Muscle Cell Phenotypic Switching by Angiotensin 1-7 Protects against Thoracic Aortic Aneurysm. *Int J Mol Sci* **2022,** 23, (24).

22. Bersi, M. R.; Bellini, C.; Humphrey, J. D.; Avril, S., Local variations in material and structural properties characterize murine thoracic aortic aneurysm mechanics. *Biomech Model Mechanobiol* **2019,** 18, (1), 203-218.

23. Atchison, D. K.; O'Connor, C. L.; Converso-Baran, K.; Bergin, I. L.; Zhang, H.; Wang, Y.; Hartman, J. R.; Ju, W.; Smrcka, A. V.; Ganesh, S. K.; Bitzer, M., Phospholipase Cε insufficiency causes ascending aortic aneurysm and dissection. *Am J Physiol Heart Circ Physiol* **2022,** 323, (6), H1376-h1387.

24. Li, H.; Guo, J.; Jia, Y.; Kong, W.; Li, W., LOXL4 Abrogation Does Not Exaggerate Angiotensin II-Induced Thoracic or Abdominal Aortic Aneurysm in Mice. *Genes (Basel)* **2021,** 12, (4), 513.

25. Oller, J.; Gabandé-Rodríguez, E.; Ruiz-Rodríguez, M. J.; Desdín-Micó, G.; Aranda, J. F.; Rodrigues-Diez, R.; Ballesteros-Martínez, C.; Blanco, E. M.; Roldan-Montero, R.; Acuña, P.; Forteza Gil, A.; Martín-López, C. E.; Nistal, J. F.; Lino Cardenas, C. L.; Lindsay, M. E.; Martín-Ventura, J. L.; Briones, A. M.; Redondo, J. M.; Mittelbrunn, M., Extracellular Tuning of Mitochondrial Respiration Leads to Aortic Aneurysm. *Circulation* **2021,** 143, (21), 2091-2109.

26. Zhao, H. M.; Jin, L.; Liu, Y.; Hong, X., Changes in expressions of miR-22-3p and MMP-9 in rats with thoracic aortic aneurysm and their significance. *Eur Rev Med Pharmacol Sci* **2020,** 24, (12), 6949-6954.

27. Deng, J.; Li, D.; Zhang, X.; Lu, W.; Rong, D.; Wang, X.; Sun, G.; Jia, S.; Zhang, H.; Jia, X.; Guo, W., Murine model of elastase-induced proximal thoracic aortic aneurysm through a midline incision in the anterior neck. *Front Cardiovasc Med* **2023,** 10, 953514.

28. Hawkins, R. B.; Salmon, M.; Su, G.; Lu, G.; Leroy, V.; Bontha, S. V.; Mas, V. R.; Jr, G. R. U.; Ailawadi, G.; Sharma, A. K., Mesenchymal Stem Cells Alter MicroRNA Expression and Attenuate Thoracic Aortic Aneurysm Formation. *J Surg Res* **2021,** 268, 221-231.

29. Tyerman, Z.; Dahl, J.; Shannon, A.; Johnston, W. F.; Pope, N. H.; Lu, G.; Upchurch, G. R., Jr.; Ailawadi, G.; Salmon, M., Murine Surgical Model of Topical Elastase Induced Descending Thoracic Aortic Aneurysm. *J Vis Exp* **2019,** 150, e60105.

30. Li, K.; Cui, M. Z.; Zhang, K. W.; Wang, G. Q.; Zhai, S. T., Effect of miR-21 on rat thoracic aortic aneurysm model by regulating the expressions of MMP-2 and MMP-9. *Eur Rev Med Pharmacol Sci* **2020,** 24, (2), 878-884.

31. Ikonomidis, J. S.; Gibson, W. C.; Gardner, J.; Sweterlitsch, S.; Thompson, R. P.; Mukherjee, R.; Spinale, F. G., A murine model of thoracic aortic aneurysms. *J Surg Res* **2003,** 115, (1), 157-63.

32. Akerman, A. W.; Collins, E. N.; Peterson, A. R.; Collins, L. B.; Harrison, J. K.; DeVaughn, A.; Townsend, J. M.; Vanbuskirk, R. L.; Riopedre-Maqueira, J.; Reyes, A.; Oh, J. E.; Raybuck, C. M.; Jones, J. A.; Ikonomidis, J. S., miR-133a Replacement Attenuates Thoracic Aortic Aneurysm in Mice. *J Am Heart Assoc* **2021,** 10, (16), e019862.

33. Fan, J.; Li, X.; Yan, Y. W.; Tian, X. H.; Hou, W. J.; Tong, H.; Bai, S. L., Curcumin attenuates rat thoracic aortic aneurysm formation by inhibition of the c-Jun N-terminal kinase pathway and apoptosis. *Nutrition* **2012,** 28, (10), 1068-74.

34. Zhou, M.; Zha, Z.; Zheng, Z.; Pan, Y., Cordycepin suppresses vascular inflammation, apoptosis and oxidative stress of arterial smooth muscle cell in thoracic aortic aneurysm with VEGF inhibition. *Int Immunopharmacol* **2023,** 116, 109759.

35. Zalghout, S.; Vo, S.; Arocas, V.; Jadoui, S.; Hamade, E.; Badran, B.; Oudar, O.; Charnaux, N.; Longrois, D.; Boulaftali, Y.; Bouton, M. C.; Richard, B., Syndecan-1 Is Overexpressed in Human Thoracic Aneurysm but Is Dispensable for the Disease Progression in a Mouse Model. *Front Cardiovasc Med* **2022,** 9, 839743.

36. Qi, X.; Wang, F.; Chun, C.; Saldarriaga, L.; Jiang, Z.; Pruitt, E. Y.; Arnaoutakis, G. J.; Upchurch, G. R., Jr.; Jiang, Z., A validated mouse model capable of recapitulating the protective effects of female sex hormones on ascending aortic aneurysms and dissections (AADs). *Physiol Rep* **2020,** 8, (22), e14631.

37. Ren, W.; Liu, Y.; Wang, X.; Jia, L.; Piao, C.; Lan, F.; Du, J., β-Aminopropionitrile monofumarate induces thoracic aortic dissection in C57BL/6 mice. *Sci Rep* **2016,** 6, 28149.

38. Xu, J.; Liu, J.; Qu, Y.; Jiang, L.; Liang, R.; Li, B.; Li, L.; Jiang, Y., Label-free quantitative proteomic analysis of serum exosomes in mice with thoracic aortic aneurysm. *Proteome Sci* **2023,** 21, (1), 19.

39. Wang, X.; Li, Q.; Li, W.; Zhang, T.; Li, X.; Jiao, Y.; Zhang, X.; Jiang, J.; Zhang, X.; Zhang, X., Dexamethasone attenuated thoracic aortic aneurysm and dissection in vascular smooth muscle cell Tgfbr2-disrupted mice with CCL8 suppression. *Exp Physiol* **2022,** 107, (6), 631-645.

40. Huang, K.; Wang, Y.; Siu, K. L.; Zhang, Y.; Cai, H., Targeting feed-forward signaling of TGFβ/NOX4/DHFR/eNOS uncoupling/TGFβ axis with anti-TGFβ and folic acid attenuates formation of aortic aneurysms: Novel mechanisms and therapeutics. *Redox Biol* **2021,** 38, 101757.

41. Zhang, R. M.; Tiedemann, K.; Muthu, M. L.; Dinesh, N. E. H.; Komarova, S.; Ramkhelawon, B.; Reinhardt, D. P., Fibrillin-1-regulated miR-122 has a critical role in thoracic aortic aneurysm formation. *Cell Mol Life Sci* **2022,** 79, (6), 314.

42. Zhao, K.; Zhu, H.; He, X.; Du, P.; Liang, T.; Sun, Y.; Jing, Z.; Zhou, J., Senkyunolide I ameliorates thoracic aortic aneurysm and dissection in mice via inhibiting the oxidative stress and apoptosis of endothelial cells. *Biochim Biophys Acta Mol Basis Dis* **2023,** 1869, (7), 166819.

43. Yang, L.; Wu, H.; Luo, C.; Zhao, Y.; Dai, R.; Li, Z.; Zhang, X.; Gong, Z.; Cai, Z.; Shen, Y.; Yu, F.; Li, W.; Zhao, H.; Zhang, T.; Zhu, J.; Fu, Y.; Wang, J.; Kong, W., Urate-Lowering Therapy Inhibits Thoracic Aortic Aneurysm and Dissection Formation in Mice. *Arterioscler Thromb Vasc Biol* **2023,** 43, (6), e172-e189.

44. Chen, J. Z.; Sawada, H.; Ye, D.; Katsumata, Y.; Kukida, M.; Ohno-Urabe, S.; Moorleghen, J. J.; Franklin, M. K.; Howatt, D. A.; Sheppard, M. B.; Mullick, A. E.; Lu, H. S.; Daugherty, A., Deletion of AT1a (Angiotensin II Type 1a) Receptor or Inhibition of Angiotensinogen Synthesis Attenuates Thoracic Aortopathies in Fibrillin1(C1041G/+) Mice. *Arterioscler Thromb Vasc Biol* **2021,** 41, (10), 2538-2550.

45. Ming, Y.; Zhou, X.; Liu, G.; Abudupataer, M.; Zhu, S.; Xiang, B.; Yin, X.; Lai, H.; Sun, Y.; Wang, C.; Li, J.; Zhu, K., PM2.5 exposure exacerbates mice thoracic aortic aneurysm and dissection by inducing smooth muscle cell apoptosis via the MAPK pathway. *Chemosphere* **2023,** 313, 137500.

46. Nettersheim, F. S.; Lemties, J.; Braumann, S.; Geißen, S.; Bokredenghel, S.; Nies, R.; Hof, A.; Winkels, H.; Freeman, B. A.; Klinke, A.; Rudolph, V.; Baldus, S.; Mehrkens, D.; Mollenhauer, M.; Adam, M., Nitro-oleic acid reduces thoracic aortic aneurysm progression in a mouse model of Marfan syndrome. *Cardiovasc Res* **2022,** 118, (9), 2211-2225.

47. Liu, M.; Li, L.; Zhu, J.; He, C.; Xu, Q.; Sun, A.; Kong, W.; Li, W.; Zhang, X., Rapamycin attenuates a murine model of thoracic aortic aneurysm by downregulating the miR-126-3p mediated activation of MAPK/ERK signalling pathway. *Biochem Biophys Res Commun* **2019,** 512, (3), 498-504.

48. Li, G.; Wang, M.; Caulk, A. W.; Cilfone, N. A.; Gujja, S.; Qin, L.; Chen, P. Y.; Chen, Z.; Yousef, S.; Jiao, Y.; He, C.; Jiang, B.; Korneva, A.; Bersi, M. R.; Wang, G.; Liu, X.; Mehta, S.; Geirsson, A.; Gulcher, J. R.; Chittenden, T. W.; Simons, M.; Humphrey, J. D.; Tellides, G., Chronic mTOR activation induces a degradative smooth muscle cell phenotype. *J Clin Invest* **2020,** 130, (3), 1233-1251.

49. Shin, S. J.; Hang, H. T.; Thang, B. Q.; Shimoda, T.; Sakamoto, H.; Osaka, M.; Hiramatsu, Y.; Yamashiro, Y.; Yanagisawa, H., Role of PAR1-Egr1 in the Initiation of Thoracic Aortic Aneurysm in Fbln4-Deficient Mice. *Arterioscler Thromb Vasc Biol* **2020,** 40, (8), 1905-1917.

50. de la Fuente-Alonso, A.; Toral, M.; Alfayate, A.; Ruiz-Rodríguez, M. J.; Bonzón-Kulichenko, E.; Teixido-Tura, G.; Martínez-Martínez, S.; Méndez-Olivares, M. J.; López-Maderuelo, D.; González-Valdés, I.; Garcia-Izquierdo, E.; Mingo, S.; Martín, C. E.; Muiño-Mosquera, L.; De Backer, J.; Nistal, J. F.; Forteza, A.; Evangelista, A.; Vázquez, J.; Campanero, M. R.; Redondo, J. M., Aortic disease in Marfan syndrome is caused by overactivation of sGC-PRKG signaling by NO. *Nat Commun* **2021,** 12, (1), 2628.

51. Jespersen, K.; Li, C.; Batra, R.; Stephenson, C. A.; Harding, P.; Sestak, K.; Foley, R. T.; Greene, H.; Meisinger, T.; Cook, J. R.; Baxter, B. T.; Xiong, W., Impact of Notch3 Activation on Aortic Aneurysm Development in Marfan Syndrome. *J Immunol Res* **2022,** 2022, 7538649.

52. Caescu, C. I.; Hansen, J.; Crockett, B.; Xiao, W.; Arnaud, P.; Spronck, B.; Weinberg, A.; Hashimoto, T.; Murtada, S. I.; Borkar, R.; Gallo, J. M.; Jondeau, G.; Boileau, C.; Humphrey, J. D.; He, J. C.; Iyengar, R.; Ramirez, F., Inhibition of HIPK2 Alleviates Thoracic Aortic Disease in Mice With Progressively Severe Marfan Syndrome. *Arterioscler Thromb Vasc Biol* **2021,** 41, (9), 2483-2493.

53. Tashima, Y.; He, H.; Cui, J. Z.; Pedroza, A. J.; Nakamura, K.; Yokoyama, N.; Iosef, C.; Burdon, G.; Koyano, T.; Yamaguchi, A.; Fischbein, M. P., Androgens Accentuate TGF-β Dependent Erk/Smad Activation During Thoracic Aortic Aneurysm Formation in Marfan Syndrome Male Mice. *J Am Heart Assoc* **2020,** 9, (20), e015773.

54. Huang, T. H.; Chang, H. H.; Guo, Y. R.; Chang, W. C.; Chen, Y. F., Vitamin B Mitigates Thoracic Aortic Dilation in Marfan Syndrome Mice by Restoring the Canonical TGF-β Pathway. *Int J Mol Sci* **2021,** 22, (21).

55. Hansen, J.; Galatioto, J.; Caescu, C. I.; Arnaud, P.; Calizo, R. C.; Spronck, B.; Murtada, S. I.; Borkar, R.; Weinberg, A.; Azeloglu, E. U.; Bintanel-Morcillo, M.; Gallo, J. M.; Humphrey, J. D.; Jondeau, G.; Boileau, C.; Ramirez, F.; Iyengar, R., Systems pharmacology-based integration of human and mouse data for drug repurposing to treat thoracic aneurysms. *JCI Insight* **2019,** 4, (11), e127652.

56. Abrial, M.; Basu, S.; Huang, M.; Butty, V.; Schwertner, A.; Jeffrey, S.; Jordan, D.; Burns, C. E.; Burns, C. G., Latent TGFβ-binding proteins 1 and 3 protect the larval zebrafish outflow tract from aneurysmal dilatation. *Dis Model Mech* **2022,** 15, (3), dmm046979.
